# Supplementary material for: A Novel tiRNA-Gly-GCC-1 Promotes Progression of Urothelial Bladder Carcinoma and Directly Targets TLR4
Source: Cancers (Basel). 2022 Sep 20;14(19):4555. doi: 10.3390/cancers14194555 (PMC9558499; doi:10.3390/cancers14194555)
Supplement: Supplementary file 1 [file cancers-14-04555-s001.zip]

Archive with 5 entries (5 files):
- Supplementary_Material - 20220808.pdf
- Video S1 LV.mp4
- Video S2 LV-NC.mp4
- Video S3 LV .mp4
- Video S4 LV-NC.mp4
